# Supplementary material for: A scalable unified framework of total and allele-specific counts for cis-QTL, fine-mapping, and prediction
Source: PubMed Central journal article supplement (PMC7930098; doi:10.1038/s41467-021-21592-8), 2021-03-03
Supplement: 41467_2021_21592_MOESM4_ESM.pdf [file 41467_2021_21592_MOESM4_ESM.pdf]

## **Description of Additional Supplementary Files**

### **Supplementary Data 1: The links to the full summary statistics of mixQTL on GTEx v8**

The mixQTL summary statistics are publicly available via the DOI's and URL's listed in the table. 49 tissues of GTEx v8 are included.
